# Supplementary material
Source: PubMed Central journal article supplement (PMC8353952)
Supplement: NIHMS1724771-supplement-1.pdf [file NIHMS1724771-supplement-1.pdf]

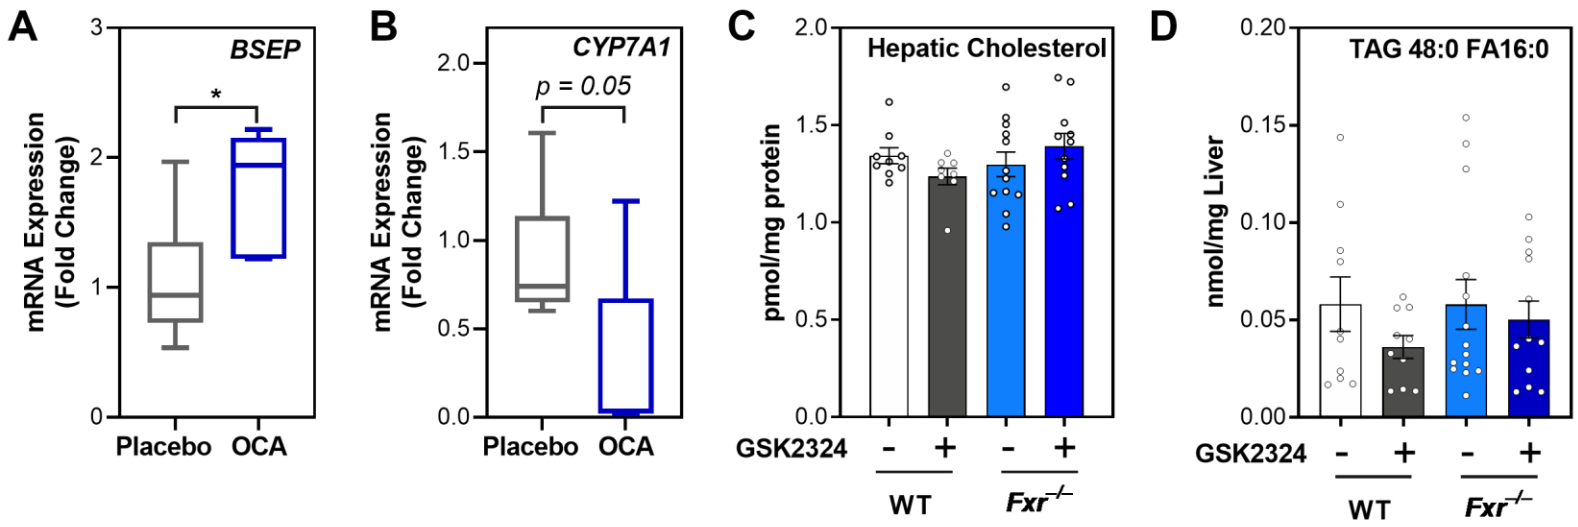

**Figure S1. Humans and mice treated with FXR agonists have selective reductions in hepatic TAG containing MUFAs and PUFAs, related to Figure 1:** (A, B) Hepatic mRNA expression of (A) *BSEP* and (B) *CYP7A1* in human patients from 1A. (C) Total hepatic cholesterol in livers of mice from 1D. (D) Bar graph of individual TAG containing saturated fatty acids in livers of mice from 1D. Data are represented as mean  $\pm$  SEM with individual animals noted as dots. \* $p < 0.05$

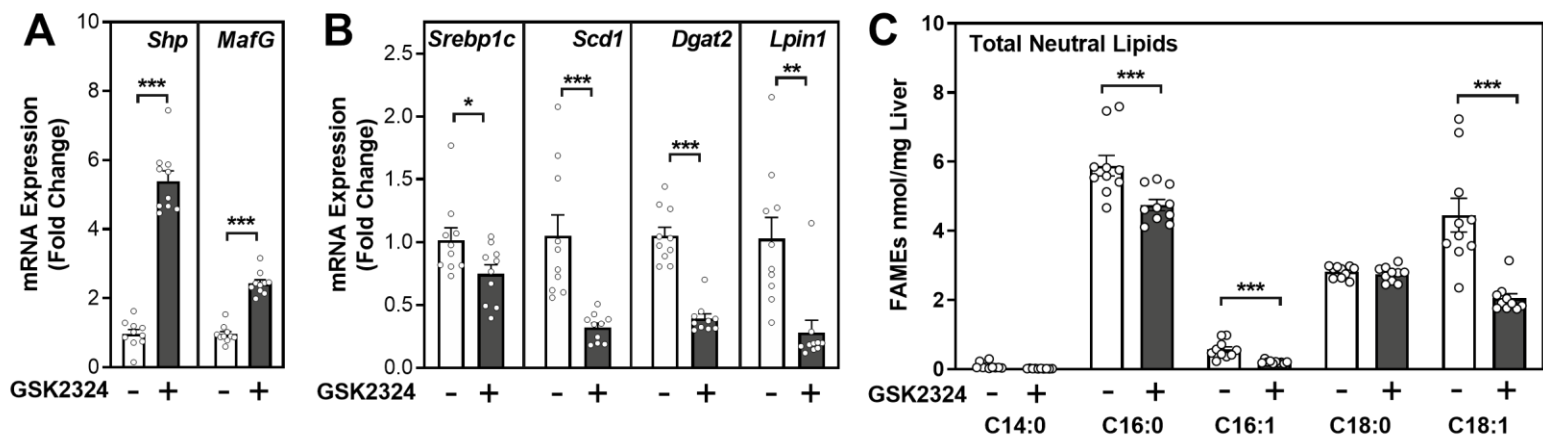

**Figure S2. Treatment with GSK2324 selectively reduces the expression of fatty acid and triglyceride synthesis genes, related to Figure 2:** (A, B) Hepatic mRNA expression of (A) FXR target genes *Shp* and *MafG* and (B) select fatty acid synthesis genes in mice from 2I. (C) Fatty acid methyl ester analysis for total neutral lipids in livers of mice treated as in 2I. Data are represented as mean  $\pm$  SEM with individual animals noted as dots. \* $p < 0.05$ , \*\* $p < 0.01$ , \*\*\* $p < 0.0001$ .

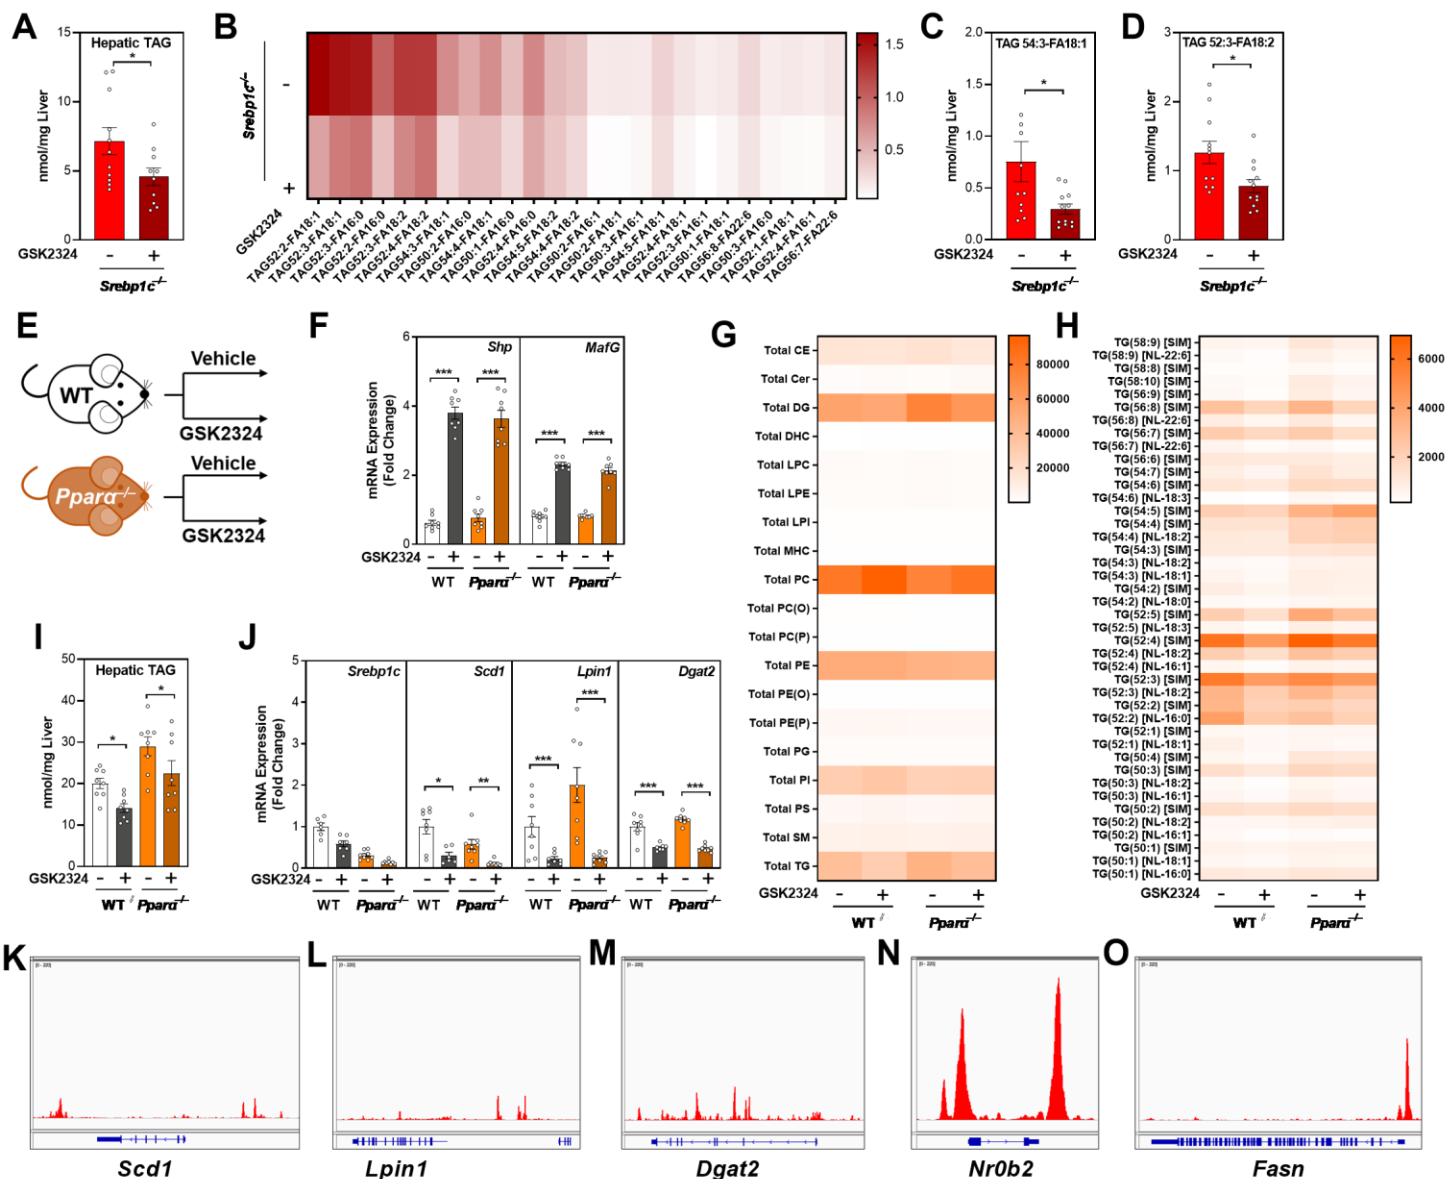

**Figure S3, FXR activation reduces hepatic TAG levels independently of SHP, SREBP1c, and PPAR $\alpha$ , related to Figure 3:** (A-D) Lipidomic analyses showing effect of GSK2324 on (A) total hepatic TAG, (B) hepatic TAG species (nmol/mg liver), (C, D) individual TAG species containing MUFA and PUFA acyl tails in *Srebp1c*<sup>-/-</sup> mice. (E) Experiment schematic: Wildtype and *Ppara*<sup>-/-</sup> mice (n=7-8/group) fed a standard rodent diet were treated for 3 days with vehicle or FXR agonist GSK2324. (F) Hepatic mRNA expression of FXR target genes *Shp* and *MafG* in mice from E. (G-I) Lipidomic analyses showing (G) hepatic lipid classes (nmol/mg liver), (H) hepatic TAG species (nmol/mg liver), and (I) total hepatic TAG in mice from E. (J) Hepatic mRNA expression of select lipogenic genes in mice from E. (K-O) Hepatic ChIP-Seq analysis of FXR binding sites in (K) *Scd1*, (L) *Lpin1*, (M) *Dgat2*, (N) *Nr0b2*, and (O) *Fasn*. Data are represented as mean  $\pm$  SEM with individual animals noted as dots. \*p < 0.05, \*\*p < 0.01, \*\*\*p < 0.0001.

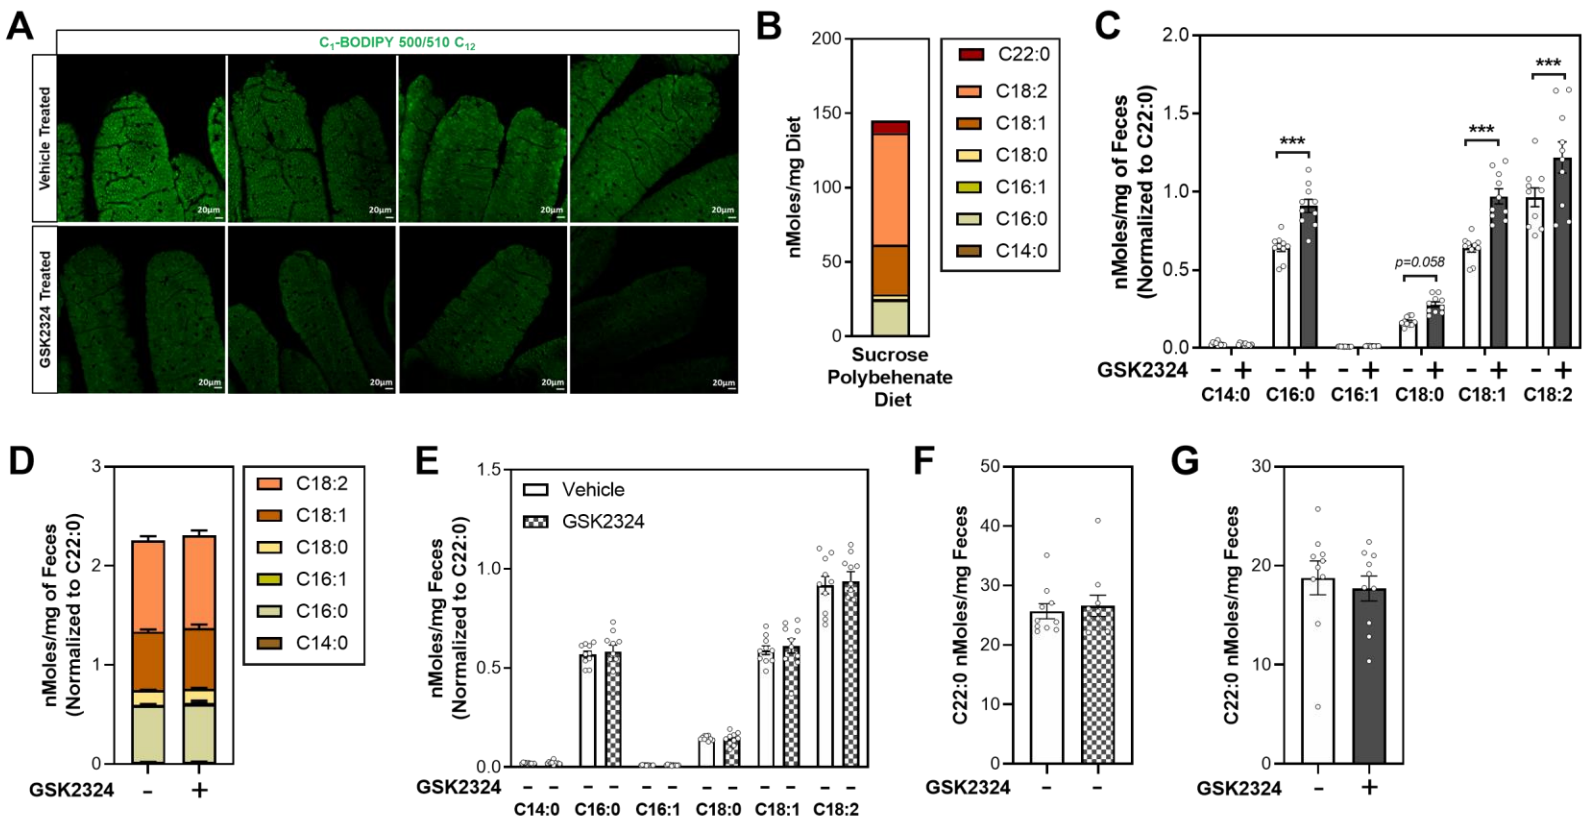

**Figure S4. FXR activation decreases intestinal lipid absorption, related to Figure 4:** (A) Additional images from intestinal sections of wildtype mice treated with vehicle or GSK2324. (B) Fatty acid composition of custom diet used in 2H. (C-E) Fecal fatty acids from mice in 2H (C) after treatment with GSK2324, (D, E) before treatment with vehicle or GSK2324. (F, G) Fecal C22:0 levels from mice (F) before and (G) after treatment with vehicle or GSK2324 as in 2H. Data are represented as mean  $\pm$  SEM with individual animals noted as dots. \*\*\* $p$ <0.0001.

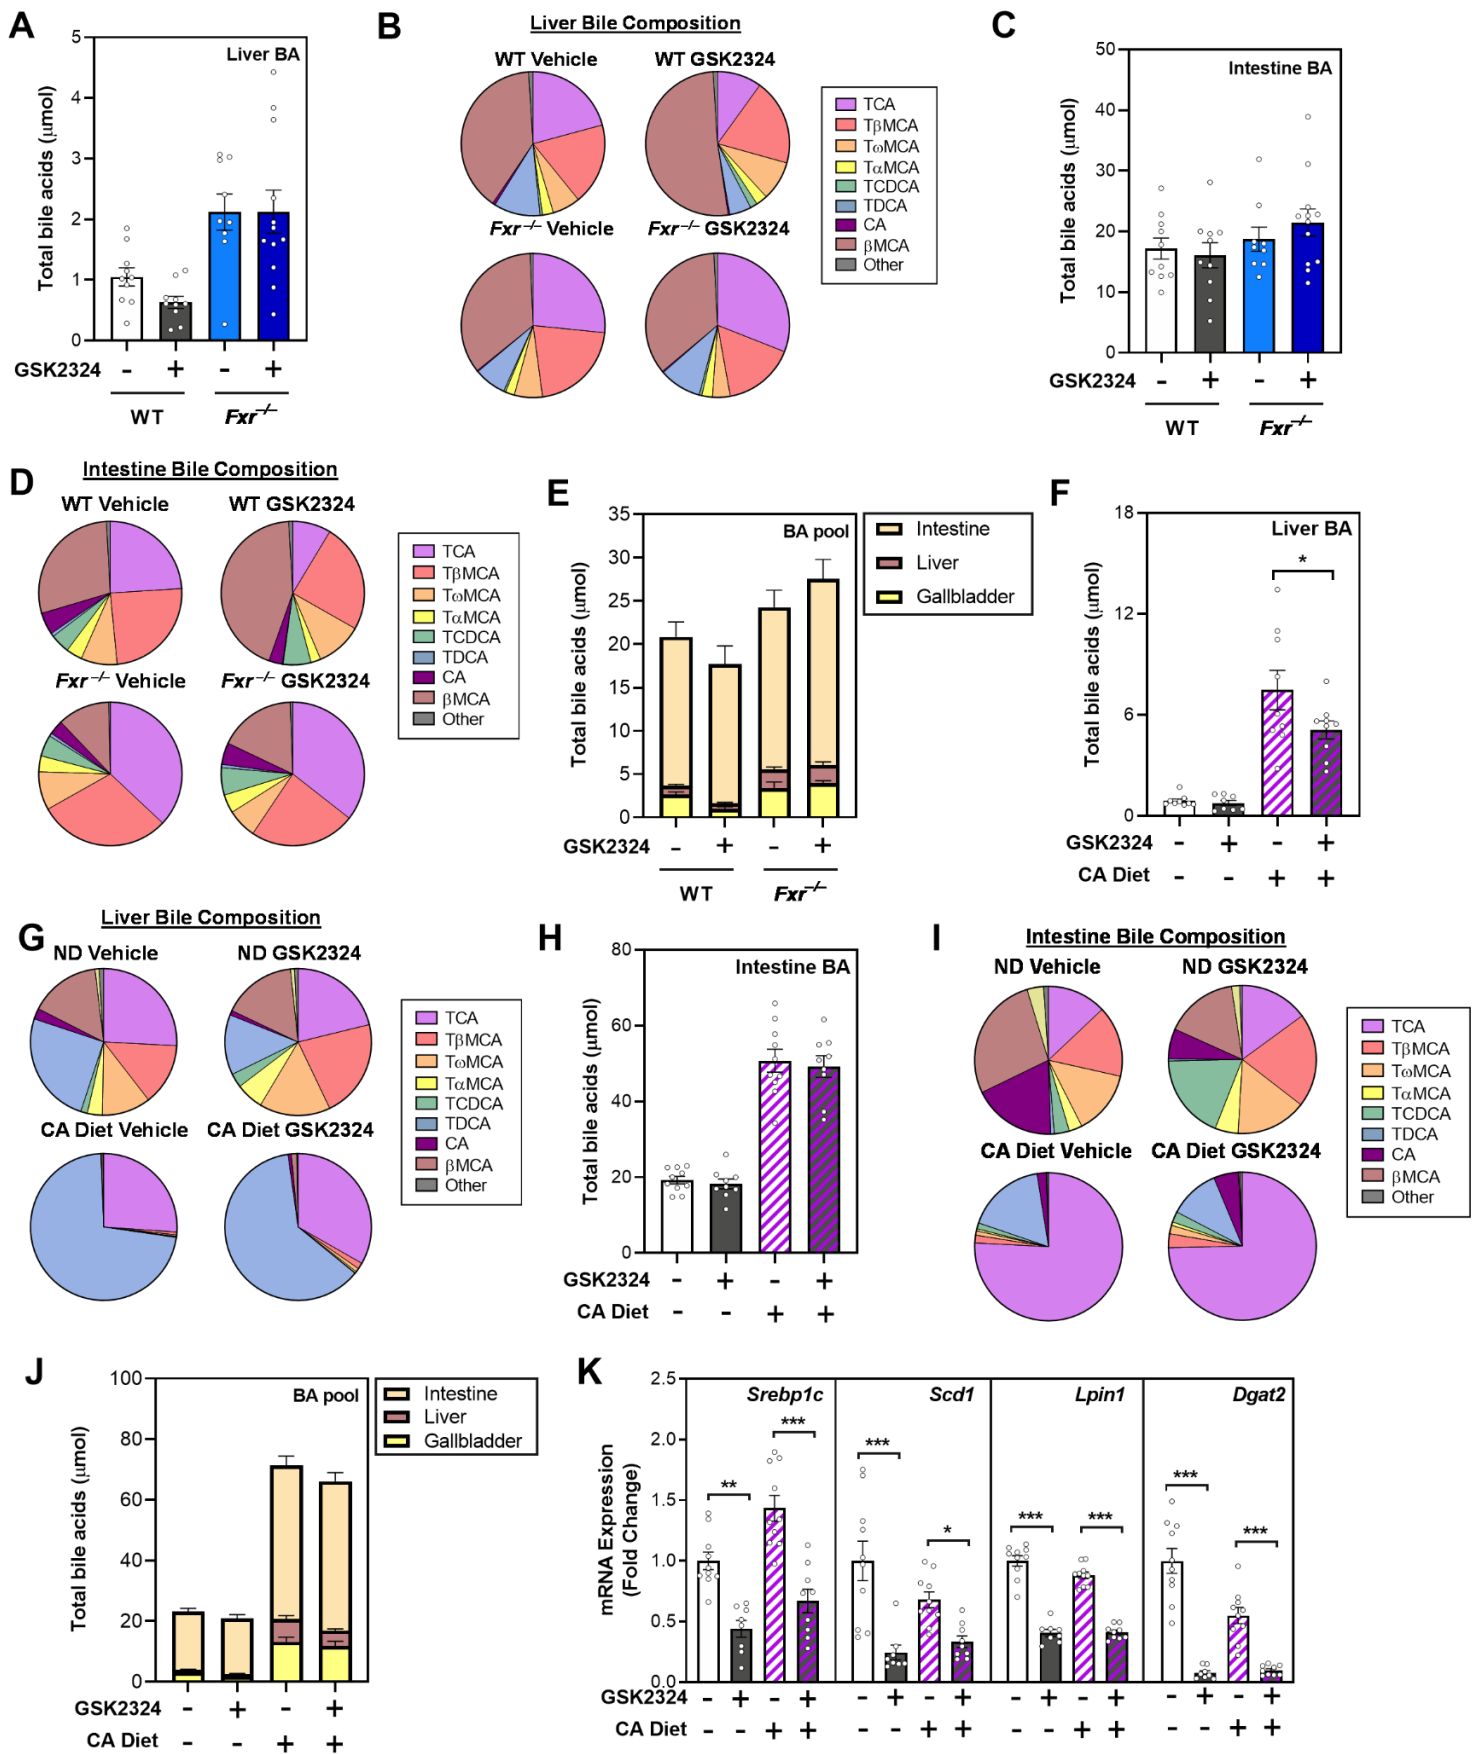

**Figure S5. Decreased intestinal lipid absorption requires FXR-dependent changes in bile acids, related to Figure 5:** (A) Total liver bile acid amount and (B) liver bile acid composition in mice from 5A. (C) Total intestinal bile acid amount and (D) intestinal bile acid composition in mice from 5A. (E) Total bile acid pool amount in mice from 5A. (F) Total liver bile acid amount and (G) liver bile acid composition in mice from 5E. (H) Total intestinal bile acid amount and (I) intestinal bile acid composition in mice from 5E. (J) Total bile acid pool amount in mice from 5E. (K) Hepatic mRNA expression of select lipogenic genes in mice from 5E. Data are represented as mean ± SEM with individual animals noted as dots. \* $p < 0.05$ , \*\* $p < 0.01$ , \*\*\* $p < 0.0001$ .



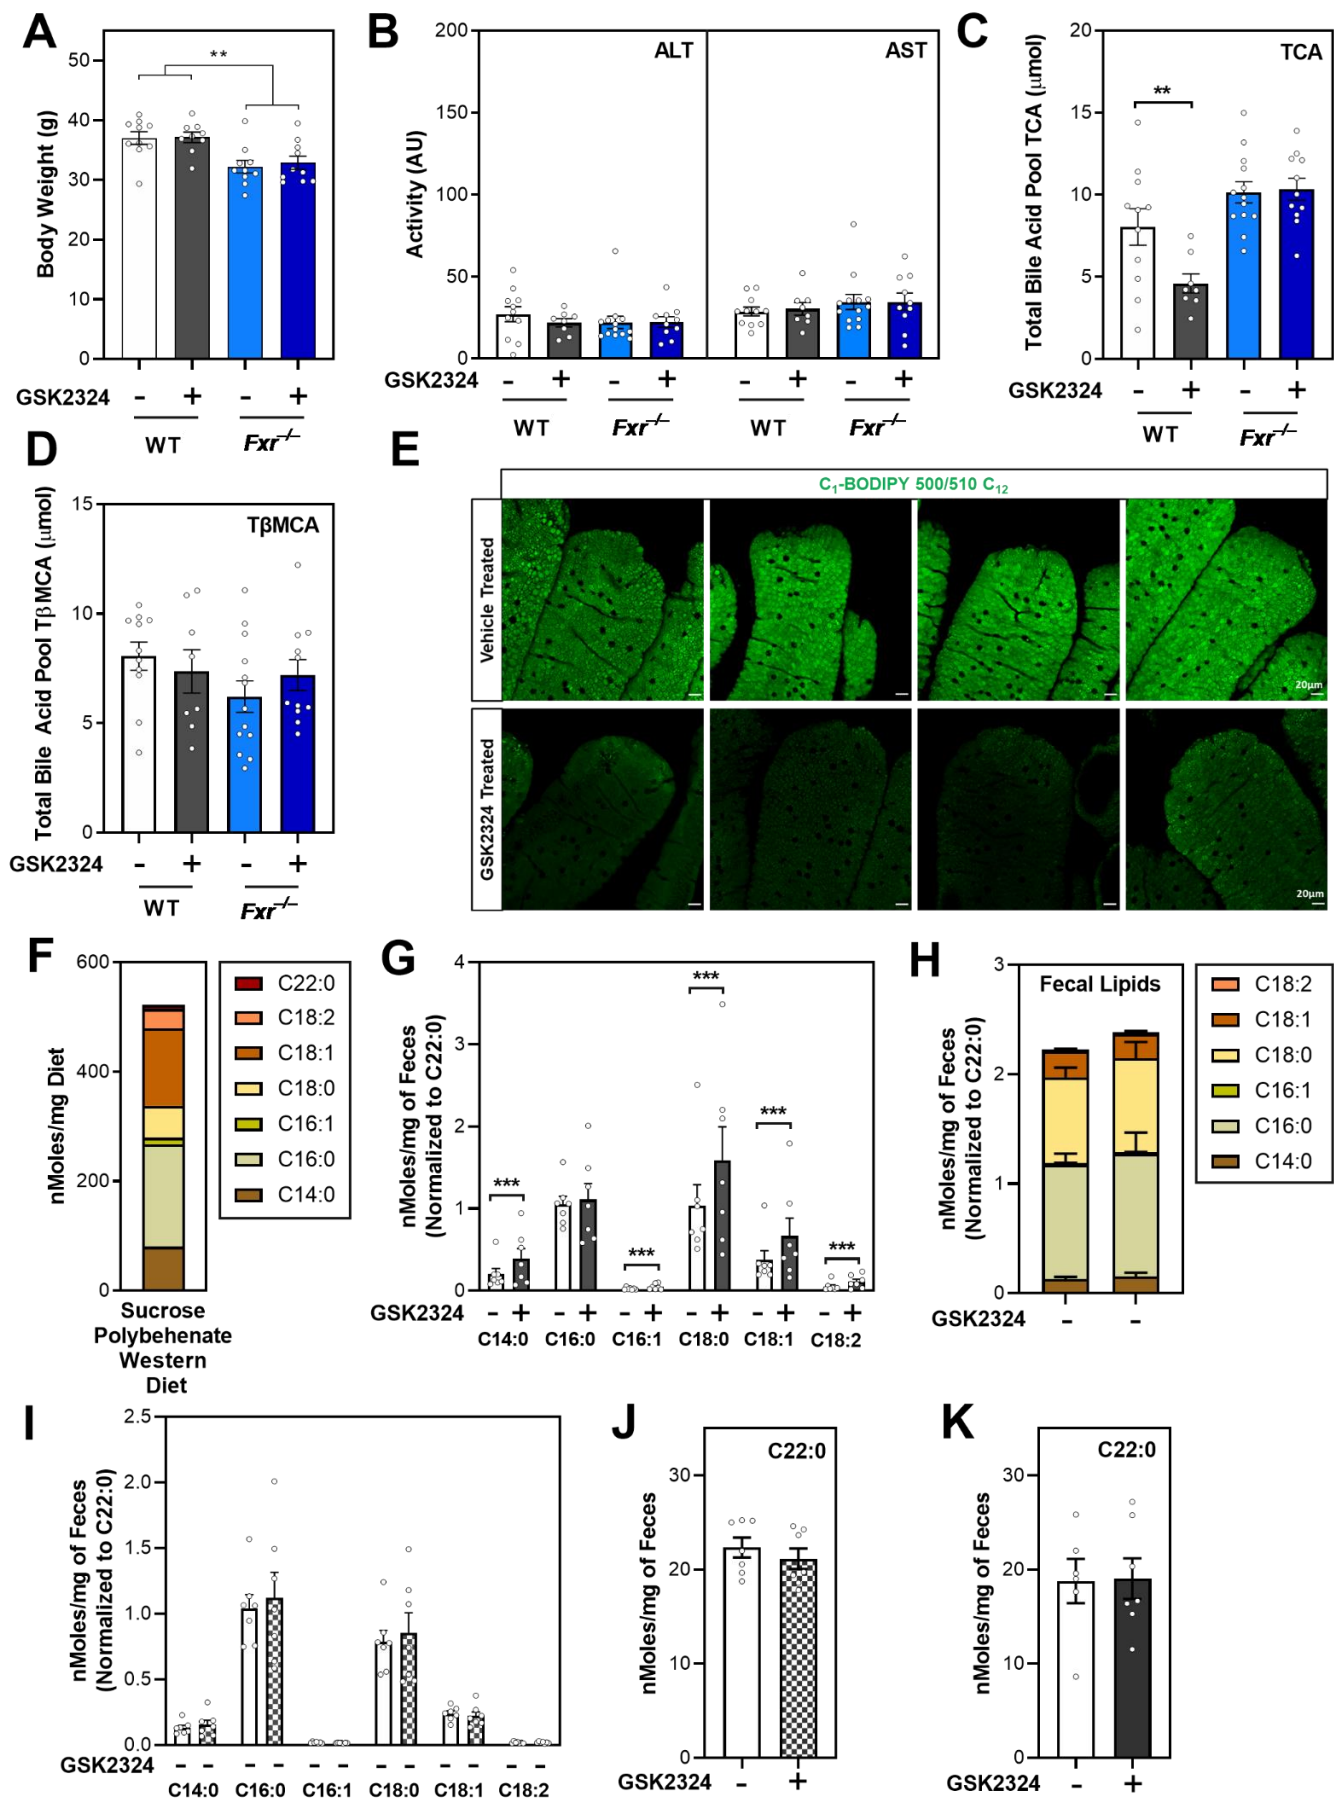

**Figure S6. In a NAFLD model, FXR activation dramatically decreases hepatic TAG and intestinal lipid absorption, related to Figure 6:** (A) Final body weight of mice treated as in 6A. (B) Plasma ALT/AST measured in mice from 6A. Total amount of (C) taurocholic acid and (D) tauro-β-muricholic acid in the bile acid pool of mice from 6A. (E) Additional images from intestinal sections from mice gavaged with BODIPY as in 6F. (F) Fatty acid composition of custom western diet used in 6J. (G-I) Fecal fatty acids from mice in 6F (G) after treatment with vehicle or GSK2324, and (H, I) before treatment with vehicle or GSK2324. (J, K) Fecal C22:0 levels from mice (J) before and (K) after treatment with vehicle or GSK2324 as in 6J. Data are represented as mean ± SEM with individual animals noted as dots. \*\*p<0.01, \*\*\*p<0.0001.

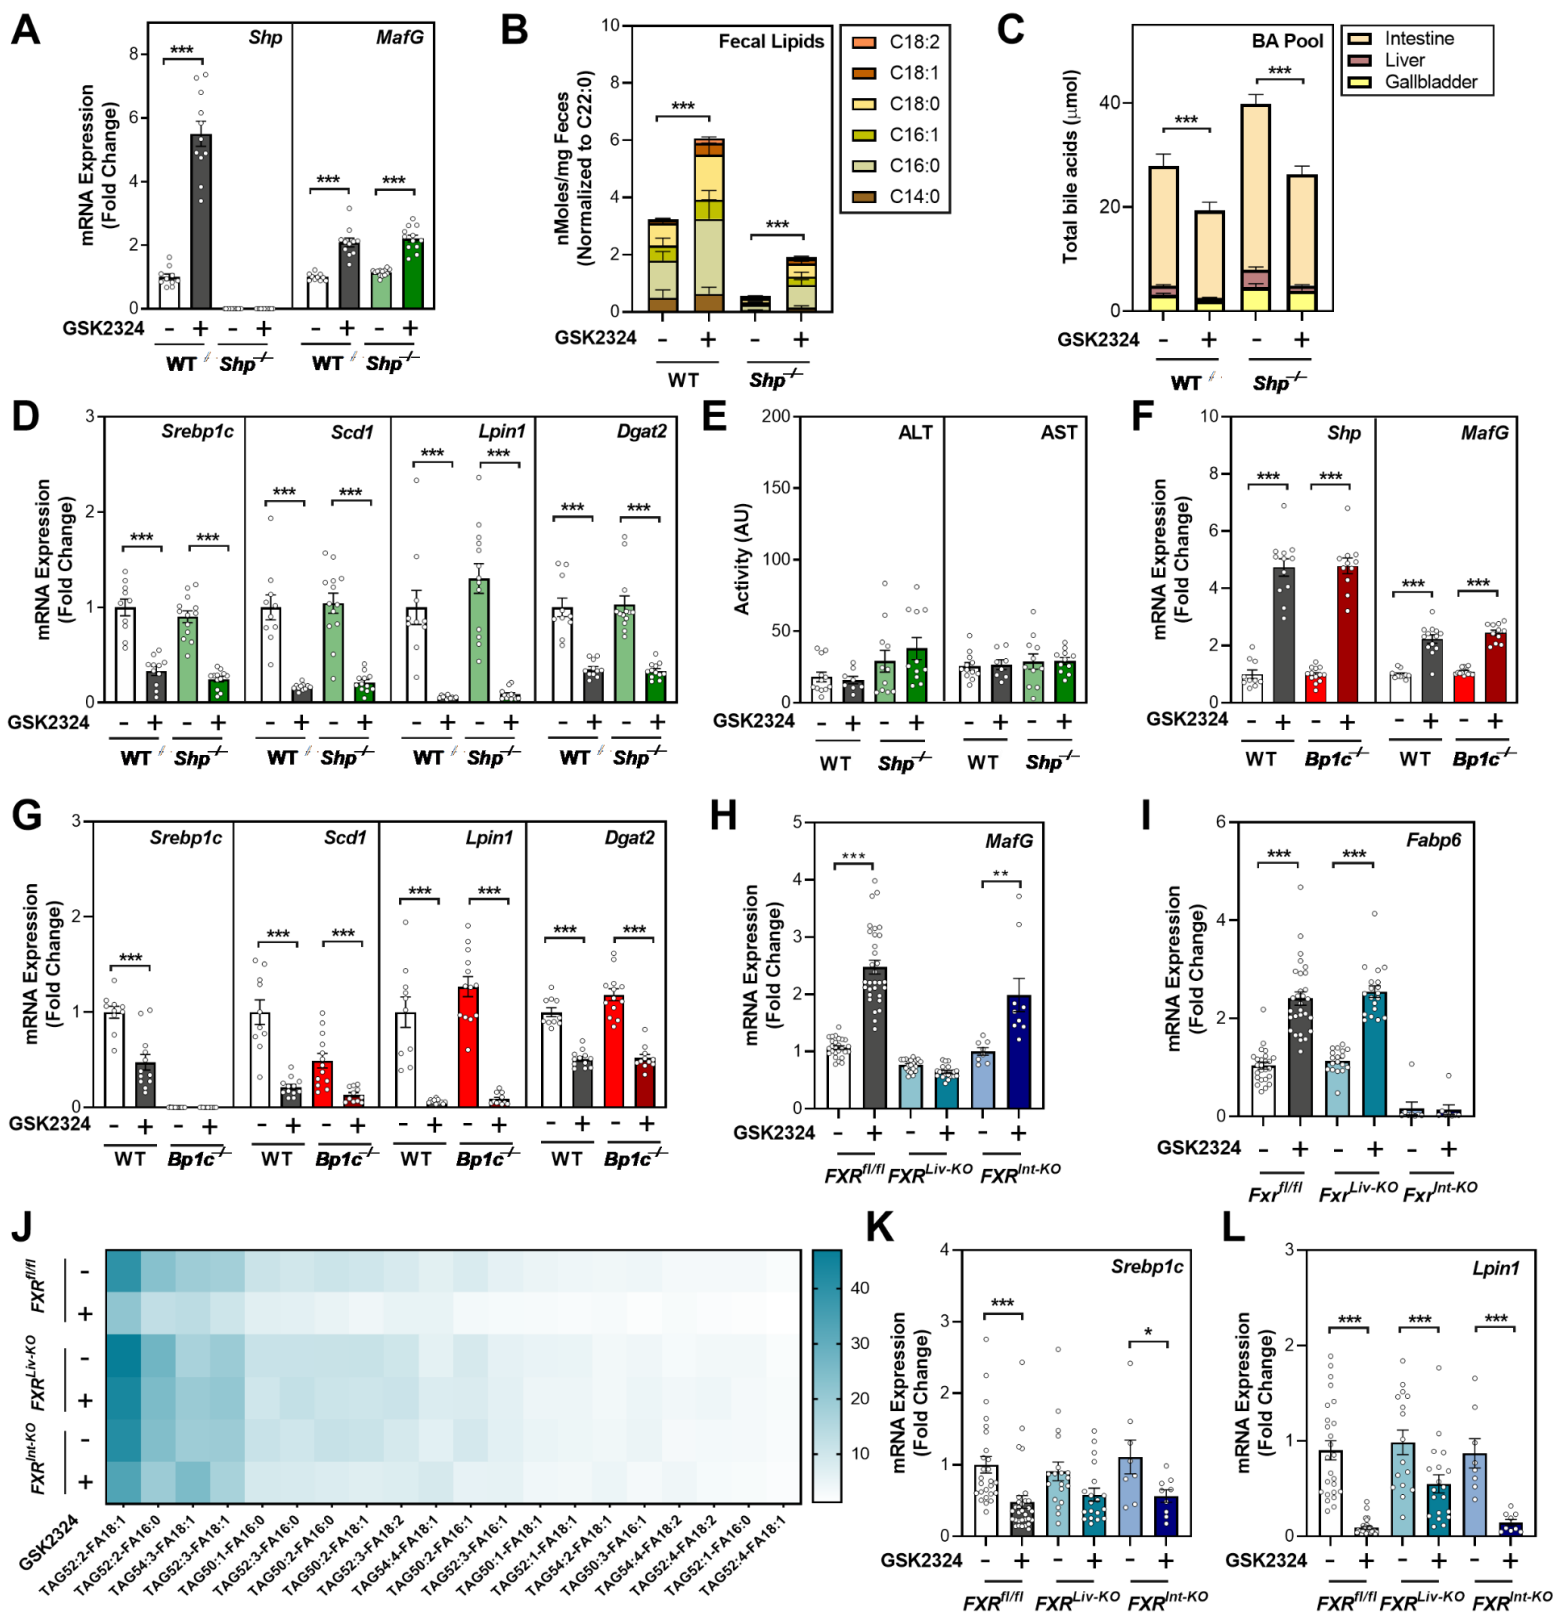

**Figure S7. Both intestinal and hepatic FXR are required for changes in hepatic TAG, independent of SHP and SREBP1C, related to Figure 7:** (A, F) Hepatic mRNA expression of FXR target genes *Shp* and *MafG* in wildtype or (A) *Shp*<sup>-/-</sup> mice and (F) *Srebp1c*<sup>-/-</sup> mice. (B) Fecal fatty acids after treatment with either vehicle or GSK2324 in mice from 7A. (C) Total bile acid pool amount in mice from 7A. (D, G) Hepatic mRNA expression of select lipogenic genes in wildtype or (D) *Shp*<sup>-/-</sup> mice and (G) *Srebp1c*<sup>-/-</sup> mice. (H, K, L) Hepatic mRNA expression of (H) *MafG*, (K) *Srebp1c*, and (L) *Lpin1* in mice from 7E. (I) Ileal mRNA expression of *Fabp6* in mice from 7E. (J) Lipidomic analysis of hepatic TAG species (nmol/mg liver) from mice in 7E. Data are represented as mean ± SEM with individual animals noted as dots. \**p*<0.05, \*\**p*<0.01, \*\*\**p*<0.0001.

| Gene Name      | Species | Primer Sequence                                           | Source                        |
|----------------|---------|-----------------------------------------------------------|-------------------------------|
| <i>Shp</i>     | Mouse   | F: CGATCCTCTTCAACCCAGATG<br>R: AGGGCTCCAAGACTTCACACA      | Lee et al., 2008              |
| <i>MafG</i>    | Mouse   | F: GACCCCAATAAAGGAAACAA<br>R: TCAACTCTCGCACCGACA          | De Aguiar Vallim et al., 2013 |
| <i>Acly</i>    | Mouse   | F: GCCAGCGGGAGCACATC<br>R: CTTTGCAGGTGCCACTTCATC          | This Paper                    |
| <i>Acss2</i>   | Mouse   | F: ACAGAGTCGCCCTTTACGTG<br>R: TCTTCAAAGTCACTTCACG         | This Paper                    |
| <i>Acaca</i>   | Mouse   | F: TGACAGACTGATCGCAGAGAAAG<br>R: TGGAGAGCCCCACACACA       | Liang et al., 2002            |
| <i>Acacb</i>   | Mouse   | F: TGAATCTCACGCGCCTACTA<br>R: GCCTCTCTTACCAGATGGA         | This Paper                    |
| <i>Fasn</i>    | Mouse   | F: GCTGCGGAAACTTCAGGAAAT<br>R: AGAGACGTGTCACTCTGGACTT     | Liang et al., 2002            |
| <i>Scd1</i>    | Mouse   | F: CCGGAGACCCCTTAGATCGA<br>R: TAGCCTGTAAAAGATTTCTGCAAACC  | Liang et al., 2002            |
| <i>Elovl1</i>  | Mouse   | F: GTGGCCCAGCCCTACCTT<br>R: TGTGCAGTGAGACCAGGACAA         | Yang et al., 2001             |
| <i>Elovl3</i>  | Mouse   | F: TTCTCACGCGGGTTAAAAATG<br>R: GGGCCTTAAGTCCTGAAACGT      | Yang et al., 2001             |
| <i>Elovl2</i>  | Mouse   | F: TCAATGCTTTCTTGACAACATG<br>R: GGTAAGAGTCCAGCAGGAACCA    | Yang et al., 2001             |
| <i>Elovl5</i>  | Mouse   | F: ATGGACACCTTTTTCTTCATCCTT<br>R: ATGGTAGCGTGGTGGTAGACATG | Yang et al., 2001             |
| <i>Elovl6</i>  | Mouse   | F: CAGCAAAGCACCCGAACTA<br>R: AGGAGCACAGTGATGTGGTG         | Yang et al., 2001             |
| <i>Gpat1</i>   | Mouse   | F: AGCAAGTCCTGCGTATCAT<br>R: CTCGTGTGGGTGATTGTGAC         | Li et al., 2009               |
| <i>Gpat2</i>   | Mouse   | F: AAGAAAAGAGGTACAGCGTATCC<br>R: GTGGAGAGCCCTCCTGCACAG    | Li et al., 2009               |
| <i>Gpat3</i>   | Mouse   | F: CTTTGAAATCGGAGGAACCA<br>R: TTTGCAAACCTGAAGTGCATC       | Li et al., 2009               |
| <i>Gpat4</i>   | Mouse   | F: GGCATGGTGACGTACCTTCT<br>R: GCTTCAGCCAGCACAAGAC         | Li et al., 2009               |
| <i>Agpat1</i>  | Mouse   | F: GCTGGCTGGCAGGAATCAT<br>R: GTCTGAGCCACCTCGGACAT         | Yang et al., 2001             |
| <i>Agpat2</i>  | Mouse   | F: TTTGAGGTCAGCGGACAGAA<br>R: AGGATGCTCTGGTGATTAGAGATGA   | Yang et al., 2001             |
| <i>Agpat3</i>  | Mouse   | F: GGAGAAAACACCTGTCCAC<br>R: TCAAGGGTGTCCGACCTG           | Li et al., 2009               |
| <i>Agpat5</i>  | Mouse   | F: CTAGCGAATCATCAAAGCACA<br>R: TCTTTCAGTACGTAGCGCACA      | Li et al., 2009               |
| <i>Lpin1</i>   | Mouse   | F: CCTTCTATGCTGCTTTTGGGAACC<br>R: GTGATCGACCACTTCGCAGAGC  | Reue Lab, UCLA                |
| <i>Lpin2</i>   | Mouse   | F: AGTTGACCCATCACCGTAG<br>R: CCCAAAGCATCAGACTTGGT         | Reue Lab, UCLA                |
| <i>Lpin3</i>   | Mouse   | F: TGGAATTGGGATGACAAGGT<br>R: CACTGCAAGTACCCCTTGGT        | Reue Lab, UCLA                |
| <i>Dgat1</i>   | Mouse   | F: TCGTGGTATCCTGAATTTGGTG<br>R: AGGTTCTCTAAAATAACCTTGCATT | Yang et al., 2001             |
| <i>Dgat2</i>   | Mouse   | F: GGCGTACTTCCGAGACTAC<br>R: TGGTCAGCAGGTTGTGTGTC         | Yang et al., 2001             |
| <i>Srebp1c</i> | Mouse   | F: GGAGCCATGGATTGCACATT<br>R: GGCCCGGGAAGTCACTGT          | Liang et al., 2002            |
| <i>BSEP</i>    | Human   | F: CAGCCCTCTCATTGGGATT<br>R: TCCGTAAACTTGGACACACTC        | This Paper                    |
| <i>CYP7A1</i>  | Human   | F: GCTTATTCTTGGAAATTAGGAGAAGG<br>R: TTGGCACCAAATTGCAGAG   | This Paper                    |
| <i>Tbp</i>     | Mouse   | F: CTCAGTTACAGGTGGCAGCA<br>R: ACCAACAATCACCACAGCA         | This Paper                    |
| <i>36b4</i>    | Mouse   | F: TTTGACAACGGCAGCATTTA<br>R: CCATTGATGATGGAGTGTGG        | This Paper                    |
| <i>Fgf15</i>   | Mouse   | F: CAGGGAGGAAATGGACTGTT<br>R: GGTGAAACACGGGGATAAAG        | This Paper                    |
| <i>Fabp6</i>   | Mouse   | F: GAGGCTGTGGGTGACAAGTT<br>R: TACGCGCTCATAGGTACAT         | This Paper                    |

**Table S1: Primer sequences used for qPCR, related to STAR methods.**



| Bile acid       | Precursor m/z | Product 1 m/z | Product 2 m/z | Explicit Retention Time | Explicit Collision Energy (precursor, product) |
|-----------------|---------------|---------------|---------------|-------------------------|------------------------------------------------|
| LCA             | 375.2904      |               |               | 20.8                    | 10                                             |
| HDCA            | 391.2853      |               |               | 17.4                    | 10                                             |
| DCA             | 391.2853      |               |               | 19.2                    | 10                                             |
| UDCA            | 405.2646      |               |               | 8.8                     | 10                                             |
| 3b7a12a         | 407.2802      |               |               | 13.2                    | 10                                             |
| $\alpha$ MCA    | 407.2802      |               |               | 14.1                    | 10                                             |
| $\beta$ MCA     | 407.2802      |               |               | 14.7                    | 10                                             |
| CA              | 407.2802      |               |               | 16.8                    | 10                                             |
| GCDCA           | 448.3068      | 74.0248       |               | 16.8                    | 10, 35                                         |
| GCA             | 464.3017      | 74.0248       |               | 12.7                    | 10, 35                                         |
| TLCA            | 482.42        | 124.0067      | 79.9578       | 17.7                    | 10, 55                                         |
| Tauro 3a7k      | 496.3         | 124.0067      | 79.9578       | 10.5                    | 10, 55                                         |
| TUDCA           | 498.2894      | 124.0067      | 79.9578       | 6.6                     | 10, 55                                         |
| T-3a6a          | 498.2894      | 124.0067      | 79.9578       | 9.7                     | 10, 55                                         |
| T-3a12b         | 498.2894      | 124.0067      | 79.9578       | 10.7                    | 10, 55                                         |
| TCDCa           | 498.2894      | 124.0067      | 79.9578       | 14.2                    | 10, 55                                         |
| TDCA            | 498.2894      | 124.0067      | 79.9578       | 14.4                    | 10, 55                                         |
| T- $\omega$ MCA | 514.284       | 124.0067      | 79.9578       | 4.3                     | 10, 55                                         |
| T- $\beta$ MCA  | 514.284       | 124.0067      | 79.9578       | 5                       | 10, 55                                         |
| T- $\alpha$ MCA | 514.284       | 124.0067      | 79.9578       | 7.7                     | 10, 55                                         |
| TCA             | 514.284       | 124.0067      | 79.9578       | 9.9                     | 10, 55                                         |

**Table S2: Bile acid retention times and mass-charge ratios used in UPLC-MS/MS methodology, related to STAR methods.**

| Bile acid (abbreviation) | Common Name                     | Systematic Name                                                                                       | Source                       | Standard Concentration Range (nM) | R-squared value | Sample dilution for quantification |
|--------------------------|---------------------------------|-------------------------------------------------------------------------------------------------------|------------------------------|-----------------------------------|-----------------|------------------------------------|
| LCA                      | Lithocholic acid                | 3 $\alpha$ -Hydroxy-5 $\beta$ -cholan-24-oic acid                                                     | Kind gift from Dr. Lee Hagey | 500-8                             | 0.9678          | 1 to 100                           |
| HDCA                     | Hyodeoxycholic acid             | 3 $\alpha$ ,6 $\alpha$ -Dihydroxy-5 $\beta$ -cholan-24-oic acid                                       | Kind gift from Dr. Lee Hagey | 500-0.2                           | 0.9915          | 1 to 100                           |
| DCA                      | Deoxycholic acid                | 3 $\alpha$ ,12 $\alpha$ -Dihydroxy-5 $\beta$ -cholan-24-oic acid                                      | Sigma-Aldrich                | 500-0.2                           | 0.9987          | 1 to 100                           |
| UDCA                     | Ursodeoxycholic acid            | 3 $\alpha$ ,7 $\beta$ -Dihydroxy-5 $\beta$ -cholan-24-oic acid                                        | Kind gift from Dr. Lee Hagey | 500-8                             | 0.9669          | 1 to 100                           |
| 3b7a12a                  |                                 | 3 $\beta$ ,7 $\alpha$ ,12 $\alpha$ -Trihydroxy-5 $\beta$ -cholan-24-oic acid                          | Kind gift from Dr. Lee Hagey | 1000-15                           | 0.998           | 1 to 100                           |
| $\alpha$ MCA             | $\alpha$ -muricholic acid       | 3 $\alpha$ ,6 $\beta$ ,7 $\alpha$ -Trihydroxy-5 $\beta$ -cholan-24-oic acid                           | Kind gift from Dr. Lee Hagey | 1000-0.5                          | 0.9974          | 1 to 100                           |
| $\beta$ MCA              | $\beta$ -muricholic acid        | 3 $\alpha$ ,6 $\beta$ ,7 $\beta$ -Trihydroxy-5 $\beta$ -cholan-24-oic acid                            | Kind gift from Dr. Lee Hagey | 1000-4                            | 0.997           | 1 to 10,000                        |
| CA                       | Cholic acid                     | 3 $\alpha$ ,7 $\alpha$ ,12 $\alpha$ -trihydroxy-5 $\beta$ -cholan-24-oic acid                         | Sigma-Aldrich                | 1000-1                            | 0.9995          | 1 to 10,000                        |
| GCDCA                    | Glyco chenodeoxycholic acid     | 3 $\alpha$ ,7 $\alpha$ -Dihydroxy-5 $\beta$ -cholan-24-oic acid N-(carboxymethyl)-amide               | Sigma-Aldrich                | 500-0.2                           | 0.9979          | 1 to 100                           |
| GCA                      | Glyco cholic acid               | 3 $\alpha$ ,7 $\alpha$ ,12 $\alpha$ -trihydroxy-5 $\beta$ -cholan-24-oic acid N-(carboxymethyl)-amide | Sigma-Aldrich                | 1000-4                            | 0.9989          | 1 to 100                           |
| TLCA                     | Tauro Lithocholic acid          | 3 $\alpha$ -Hydroxy-5 $\beta$ -cholan-24-oic acid N-(2-sulphoethyl)-amide                             | Kind gift from Dr. Lee Hagey | 1000-0.5                          | 0.9986          | 1 to 100                           |
| 7-oxo-TLCA               | 7-oxolithocholic acid           | 3 $\alpha$ -Hydroxy-7-oxo-5 $\beta$ -cholan-24-oic acid N-(2-sulphoethyl)-amide                       | Kind gift from Dr. Lee Hagey | 1000-0.5                          | 0.9935          | 1 to 10,000                        |
| TUDCA                    | Tauro Ursodeoxycholic acid      | 3 $\alpha$ ,7 $\beta$ -Dihydroxy-5 $\beta$ -cholan-24-oic acid N-(2-sulphoethyl)-amide                | Kind gift from Dr. Lee Hagey | 1000-2                            | 0.9717          | 1 to 10,000                        |
| T-HDCA                   | Tauro Hyodeoxycholic acid       | 3 $\alpha$ ,6 $\alpha$ -Dihydroxy-5 $\beta$ -cholan-24-oic acid N-(2-sulphoethyl)-amide               | Kind gift from Dr. Lee Hagey | 1000-2                            | 0.9945          | 1 to 10,000                        |
| T-3a12b                  | Tauro Lagodeoxycholic acid      | 3 $\alpha$ ,12 $\beta$ -Dihydroxy-5 $\beta$ -cholan-24-oic acid N-(2-sulphoethyl)-amide               | Kind gift from Dr. Lee Hagey | 1000-4                            | 0.993           | 1 to 10,000                        |
| TCDCA                    | Tauro Chenodeoxycholic acid     | 3 $\alpha$ ,7 $\alpha$ -Dihydroxy-5 $\beta$ -cholan-24-oic acid N-(2-sulphoethyl)-amide               | Sigma-Aldrich                | 1000-0.5                          | 0.9985          | 1 to 10,000                        |
| TDCA                     | Tauro deoxycholic acid          | 3 $\alpha$ ,12 $\alpha$ -Dihydroxy-5 $\beta$ -cholan-24-oic acid N-(2-sulphoethyl)-amide              | Sigma-Aldrich                | 1000-0.5                          | 0.9995          | 1 to 10,000                        |
| T- $\omega$ MCA          | Tauro $\omega$ -muricholic acid | 3 $\alpha$ ,6 $\alpha$ ,7 $\beta$ -Trihydroxy-5 $\beta$ -cholan-24-oic acid N-(2-sulphoethyl)-amide   | Kind gift from Dr. Lee Hagey | see TCA                           |                 | 1 to 10,000                        |
| T- $\beta$ MCA           | Tauro $\beta$ -muricholic acid  | 3 $\alpha$ ,6 $\beta$ ,7 $\beta$ -Trihydroxy-5 $\beta$ -cholan-24-oic acid N-(2-sulphoethyl)-amide    | Kind gift from Dr. Lee Hagey | see TCA                           |                 | 1 to 10,000                        |
| T- $\alpha$ MCA          | Tauro $\alpha$ -muricholic acid | 3 $\alpha$ ,6 $\beta$ ,7 $\alpha$ -Trihydroxy-5 $\beta$ -cholan-24-oic acid N-(2-sulphoethyl)-amide   | Kind gift from Dr. Lee Hagey | see TCA                           |                 | 1 to 10,000                        |
| TCA                      | Tauro cholic acid               | 3 $\alpha$ ,7 $\alpha$ ,12 $\alpha$ -trihydroxy-5 $\beta$ -cholan-24-oic acid N-(2-sulphoethyl)-amide | Sigma-Aldrich                | 10000-40                          | 0.9959          | 1 to 10,000                        |

**Table S3: Bile acid standard information and catalogue numbers, related to STAR methods.**
